# Supplementary material for: Direction to an Internet Support Group Compared With Online Expressive Writing for People With Depression And Anxiety: A Randomized Trial
Source: PubMed Central journal article supplement (PMC4887661; doi:10.2196/mental.5133), 2016-05-17
Supplement: mental_v3i2e12_app1.pdf [file mental_v3i2e12_app1.pdf]

Table 2: Demographics for all participants who (1) completed the baseline measures, and (2) were eligible for analysis, by condition.

|                                   | Baseline  | Expressive writing completers | ISG completers |
|-----------------------------------|-----------|-------------------------------|----------------|
| Variable                          | n = 863   | n = 101                       | n = 103        |
| Gender                            |           |                               |                |
| Male                              | 235 (27%) | 24 (24%)                      | 26 (25%)       |
| Female                            | 628 (73%) | 77 (77%)                      | 77 (75%)       |
| Age                               |           |                               |                |
| Mean (SD)                         | 34 (12)   | 37 (12)                       | 35 (12)        |
| Range                             | 18-75     | 18-64                         | 18-66          |
| Employment status                 |           |                               |                |
| Full-time                         | 393 (46%) | 36 (36%)                      | 47 (45%)       |
| Part-time                         | 110 (13%) | 22 (22%)                      | 16 (16%)       |
| Student                           | 153 (18%) | 9 (9%)                        | 19 (18%)       |
| Looking after home/family         | 40 (5%)   | 4 (4%)                        | 5 (5%)         |
| Unemployed because of poor health | 60 (7%)   | 13 (13%)                      | 9 (9%)         |
| Unemployed for other reasons      | 69 (8%)   | 11 (11%)                      | 5 (5%)         |

|           |                                          |           |          |          |
|-----------|------------------------------------------|-----------|----------|----------|
|           | Retired                                  | 25 (2%)   | 6 (6%)   | 1 (1%)   |
|           | Other                                    | 13 (1%)   | 0 (0%)   | 1 (1%)   |
| Education |                                          |           |          |          |
|           | Some high/secondary school               | 22 (3%)   | 2 (2%)   | 1 (1%)   |
|           | Completed high/secondary school          | 86 (10%)  | 7 (7%)   | 14 (14%) |
|           | Some college/university                  | 314 (36%) | 29 (29%) | 24 (23%) |
|           | Degree (eg, BSc BA)                      | 282 (33%) | 40 (40%) | 37 (36%) |
|           | Advanced degree (eg, Masters, Doctorate) | 159 (18%) | 23 (23%) | 27 (26%) |
| Ethnicity |                                          |           |          |          |
|           | White                                    | 753 (87%) | 91 (91%) | 94 (91%) |
|           | Asian (including Indian)                 | 38 (4%)   | 4 (4%)   | 3 (3%)   |
|           | Black                                    | 34 (4%)   | 0 (0%)   | 1 (1%)   |
|           | Hispanic                                 | 9 (1%)    | 1 (1%)   | 0 (0%)   |
|           | Mixed                                    | 13 (2%)   | 4 (4%)   | 4 (4%)   |
|           | Other                                    | 16 (2%)   | 1 (1%)   | 1 (1%)   |

|                                          |                      |           |          |          |
|------------------------------------------|----------------------|-----------|----------|----------|
| Country                                  |                      |           |          |          |
|                                          | United Kingdom       | 578 (67%) | 63 (63%) | 65 (63%) |
|                                          | United States        | 252 (29%) | 32 (32%) | 32 (31%) |
|                                          | Canada               | 33 (4%)   | 6 (6%)   | 6 (6%)   |
| Consulted a health care professional     |                      |           |          |          |
|                                          | Within the last year | 393 (45%) | 54 (54%) | 50 (48%) |
|                                          | More than a year ago | 281 (33%) | 35 (35%) | 35 (34%) |
|                                          | Never                | 181 (21%) | 11 (11%) | 17 (17%) |
|                                          | Not sure             | 8 (1%)    | 1 (1%)   | 1 (1%)   |
| Seeing a therapist                       |                      |           |          |          |
|                                          | Yes                  | 191 (22%) | 26 (26%) | 26 (26%) |
|                                          | No                   | 659 (76%) | 72 (72%) | 71 (71%) |
|                                          | Not sure             | 13 (2%)   | 3 (3%)   | 3 (3%)   |
| Taking medication                        |                      |           |          |          |
|                                          | Yes                  | 257 (30%) | 33 (33%) | 41 (40%) |
|                                          | No                   | 601 (69%) | 66 (66%) | 61 (59%) |
|                                          | Not sure             | 5 (1%)    | 2 (1%)   | 1 (1%)   |
| Used a face-to-face support group before |                      |           |          |          |
|                                          | Yes                  | 180 (21%) | 19 (19%) | 20 (19%) |
|                                          | No                   | 672 (78%) | 80 (80%) | 80 (78%) |
|                                          | Not sure             | 11 (1%)   | 2 (2%)   | 3 (3%)   |
| Used an ISG before                       |                      |           |          |          |

|  |          |           |          |          |
|--|----------|-----------|----------|----------|
|  | Yes      | 107 (12%) | 16 (16%) | 14 (13%) |
|  | No       | 736 (85%) | 82 (82%) | 86 (84%) |
|  | Not sure | 20 (3%)   | 3 (3%)   | 3 (3%)   |
